1                    Bayesian tip dating reveals heterogeneous  
2                    morphological clocks in Mesozoic birds

3

4                    Chi Zhang<sup>1,2,\*</sup> and Min Wang<sup>1,2</sup>

5                    September 18, 2018

6                    <sup>1</sup>Key Laboratory of Vertebrate Evolution and Human Origins, Institute of Vertebrate  
7                    Paleontology and Paleoanthropology, Chinese Academy of Sciences, Beijing 100044,  
8                    China

9                    <sup>2</sup>Center for Excellence in Life and Palaeoenvironment, Chinese Academy of Sciences,  
10                    Beijing 100044, China

11                    \*Corresponding author: E-mail: zhangchi@ivpp.ac.cn

12

13                    Running head: BAYESIAN TIP DATING OF MESOZOIC BIRDS

14

15 *Abstract.*—Recently, comprehensive morphological datasets including nearly all the  
16 well-recognized Mesozoic birds become available, making it feasible for statistically  
17 rigorous methods to unveil finer evolutionary patterns during early avian evolution.  
18 However, few quantitative and statistical studies have yet been performed. Here, we  
19 exploited the advantage of Bayesian tip dating under relaxed morphological clocks to  
20 infer both the divergence times and evolutionary rates while accounting for their  
21 uncertainties. We further subdivided the characters into six body regions (i.e., skull,  
22 axial skeleton, pectoral girdle and sternum, forelimb, pelvic girdle, and hindlimb) to  
23 assess evolutionary rate heterogeneity both along the lineages and across partitions.  
24 We observed extremely high rates of morphological character changes during early  
25 avian evolution and the clock rates are quite heterogeneous among the six regions.  
26 The branch subtending Pygostylia shows extremely high rate in the axial skeleton,  
27 while the branches subtending Ornithothoraces and Enantiornithes show very high  
28 rates in the pectoral girdle and sternum, and moderately high rates in the forelimb.  
29 The extensive modifications in these body regions largely correspond to refinement of  
30 the flight capability. The rest of the relatively slow and even rates suggest that there is  
31 no dominant selective pressure in favoring of modifications in the skull and pelvis.  
32 This study reveals the power and flexibility of Bayesian tip dating implemented in  
33 MrBayes to investigate evolutionary dynamics in deep time.  
34  
35 *Keywords:* Mesozoic birds, tip dating, relaxed clock, MrBayes

## 36 Introduction

37 Birds are one of the most speciose (over 10,000 recognized species) and ecological  
38 diverse living vertebrates (Gill 2007). The origin and evolution of birds have long  
39 been a hot debate in evolutionary biology, although it has been generally accepted that  
40 birds underwent two large-scale radiations during their 160 million years evolution,  
41 one for the stem groups in the Cretaceous, and the other for the crown groups in the  
42 Paleogene (Mayr 2009; Prum et al. 2015; Wang and Zhou 2017). Over the last few  
43 years, numerous well-preserved Mesozoic bird fossils have been described (Chiappe  
44 and Meng 2016; Wang and Zhou 2017), and consensus has been approached  
45 regarding their systematic relationships (O'Connor and Zhou 2013; Wang et al. 2017;  
46 2018). These wealthy data have significantly bridged the large morphological gap  
47 between birds and their non-avian theropod predecessors (O'Connor and Zhou 2015;  
48 Wang and Zhou 2017), and demonstrated their evolutionary success related to novel  
49 traits. Expanded morphological characters that cover the major Mesozoic avian  
50 groups with chronological data become accessibly recently (Wang and Lloyd 2016),  
51 making it possible to trace the early avian evolution more quantitatively and to address  
52 important questions such as the divergence times of the major clades and the patterns  
53 of morphological character changes in and between lineages (Brusatte et al. 2014;  
54 Lloyd 2016). However, few quantitative and statistical studies for early avian  
55 evolution have yet been performed.

56 In a previous study, Wang and Lloyd (2016) investigated evolutionary rate  
57 heterogeneity in Mesozoic birds under maximum parsimony using a large  
58 morphological dataset containing 262 characters and 58 taxa (Wang et al. 2015). The  
59 approach was stepwise: first to infer the most parsimonious trees, then to inform the  
60 internal node ages using certain *ad hoc* measures, and last to obtain the branch rates  
61 from dividing the number of parsimonious changes by the time durations along the  
62 corresponding branches. It did not account for the uncertainties of tree topology, times  
63 and rates statistically, and was unable to model the evolutionary process explicitly.  
64 The dataset was then extended to 280 characters and 68 taxa recently (Wang and  
65 Zhou 2018), with newly recognized species and significantly revised morphological  
66 character scorings. Moreover, we revised this dataset according to (Field et al. 2018),  
67 mainly focusing on the cranial morphology of Ichthyornithiformes and  
68 Hesperornithiformes. The modified dataset contains nearly all the well-recognized  
69 Mesozoic birds and represents the most comprehensive morphological characters at  
70 present, thus provides more power to unveil finer evolutionary patterns and becomes  
71 applicable to more statistically rigorous methods.

72 We further subdivided the characters into six partitions, each representing a  
73 different anatomical region (i.e., skull, axial skeleton, pectoral girdle and sternum,  
74 forelimb, pelvic girdle, and hindlimb), to assess evolutionary rate heterogeneity.  
75 Partitioned analysis has been attempted by Clarke and Middleton (2008) on a much  
76 smaller dataset of stem birds under a Bayesian non-clock model to examine the

77 branch-length variations across three body regions. Since each branch length was a  
78 product of geological time duration and evolutionary rate, the two elements could not  
79 be distinguished without a time tree and clock assumption.

80 Here, we exploited the advantage of tip dating to infer both the divergence times  
81 and evolutionary rates while accounting for their uncertainties in a coherent Bayesian  
82 statistical framework. The technique was originally developed for analyses combining  
83 both morphological and molecular data (Pyron 2011; Ronquist et al. 2012a; 2016;  
84 Zhang et al. 2016; Lee 2016; Gavryushkina et al. 2016) and has been termed as  
85 “total-evidence dating”. It has also been productively applied to morphological data  
86 only (Lee et al. 2014; Bapst et al. 2016; Matzke and Wright 2016; King et al. 2017)  
87 and we use “tip dating” for that matter. This approach has the essential strengths of  
88 incorporating various sources of information from the fossil record directly in the  
89 analysis, modeling the speciation process explicitly through a probabilistic model  
90 allowing for parameter inference and model selection, and utilizing the state-of-the-art  
91 developments in Bayesian computation.

## 92 **Materials and methods**

### 93 *Morphological data*

94 The morphological data used in this study is based on Wang and Zhou (2018)  
95 which is extended and revised from Wang et al. (2015). Character scorings for  
96 *Ichthyornis dispar*, *Hesperornis regalis*, *Parahesperornis alexi*, and *Baptornis*

97 *adventus* were further revised according to Field et al. (2018). The modified dataset  
98 consists of 280 morphological characters and 68 operational taxonomic units  
99 (Dromaeosauridae as the outgroup, 65 Mesozoic and 2 extant birds). Detailed  
100 character descriptions are listed in Supplementary Material.

101 The characters were further partitioned into six anatomical regions to assess  
102 evolutionary rate heterogeneity across these regions: skull (53 characters), axial  
103 skeleton (36 characters), pectoral girdle and sternum (48 characters), forelimb (65  
104 characters), pelvic girdle (23 characters), and hindlimb (55 characters). Each partition  
105 included more than 20 characters to ensure sufficient information for inference.

#### 106 *Tip dating*

107 In Bayesian tip dating framework, we infer the posterior probability distribution of  
108 the model parameters, which combines the information from the morphological  
109 characters (likelihood) and the priors (including the distributions of the fossil ages and  
110 the other parameters in the tree model and clock model). For the likelihood, the Mk  
111 model (Lewis 2001) was used for the character state substitution with gamma rate  
112 variation across characters. The gamma distribution has mean 1.0 ( $\alpha = \beta$ ) and was  
113 approximated with four discrete categories (Yang 1994). 36 characters were defined  
114 as ordered (Supplementary Information), which means instantaneous change is only  
115 allowed between adjacent states, the rest of the characters were thus unordered. The

116 prior for gamma shape  $\alpha$  was exponential(1), while the priors for the time tree and the  
117 relaxed clock model parameters are described in detail in the following sections.

118 In order to root the tree properly and infer the evolutionary rates more reliably, we  
119 applied five topology constraints as Aves, Pygostylia, Ornithothoraces, Enantiornithes  
120 and Ornithuromorpha (Fig. 1), each of which forms a monophyletic clade.

121 The posterior distribution was estimated using Markov chain Monte Carlo  
122 (MCMC). We executed two independent runs with four chains (one cold and three hot)  
123 per run for 40 million iterations and sampled every 2000 iterations. The first 25%  
124 samples were discarded as burn-in for each run, and the remaining samples from the  
125 two runs were combined after checking consistency between runs.

#### 126 *Tree model*

127 The fossilized birth-death process (Stadler 2010; Heath et al. 2014; Gavryushkina  
128 et al. 2014; Zhang et al. 2016) was used to model speciation, extinction, fossilization  
129 and sampling, which gave rise to the prior distribution of the time tree  $\mathcal{T}$ . The process  
130 starts at the root with two lineages sharing the same origin. Each lineage bifurcates  
131 with a constant rate  $\lambda$  and goes extinct with a constant rate  $\mu$ . Concurrently, each  
132 lineage is sampled with a constant rate  $\psi$  and is removed from the process upon  
133 sampling with probability  $r$ . Extant taxa are sampled with probability  $\rho$ . The explicit  
134 derivation of the probability density function was given in Gavryushkina et al. (2014,  
135 Equation 4). When the removal probability  $0 \leq r < 1$ , the sampled tree may contain

136 fossil ancestors (i.e., fossils with sampled descendants), while setting  $r = 1$  disables

137 fossil ancestors (i.e., all fossils are at the tips).

138 The age of each fossil bird was assigned a uniform prior with lower and upper

139 bounds from the corresponding stratigraphic range (Supplementary Information). The

140 root age was assigned an offset exponential prior with mean 169 Ma (slightly older

141 than the first appearance datum of Dromaeosauridae) and minimum 153 Ma (slightly

142 older than the first appearance datum of *Archaeopteryx*). For inference, we

143 reparametrized the speciation, extinction and sampling rates and assigned priors as  $d$

144  $= \lambda - \mu - r\psi \sim \text{exponential}(100)$  with mean 0.01,  $v = (\mu + r\psi)/\lambda$  and  $s = \psi/(\mu + \psi) \sim$

145  $\text{uniform}(0, 1)$ . The sampling proportion of extant taxa (*Anas* and *Gallus*) was set to

146 0.0002, based on the number of described living bird species around ten thousands

147 (Gill and Wright 2006).

148 *Clock model*

149 We applied the independent gamma (white noise) relaxed clock model (Lepage et

150 al. 2007) to investigate evolutionary rate heterogeneity both along the tree and across

151 the six anatomical regions (partitions). The model was reparametrized aiming to

152 articulate the relative rates. Specifically, the model assumes that the substitution rate

153 (clock rate, in unit of substitutions per character per myr) of branch  $i$  in partition  $j$ ,  $c_{ij}$ ,

154 is a product of the mean rate  $c$  and the relative rate  $r_{ij}$  (i.e.,  $c_{ij} = cr_{ij}$ ), and  $r_{ij}$  is gamma

155 distributed with mean 1.0 and variance  $\sigma_j^2/(t_i c)$ , where  $t_i$  is the geological time duration



156 of branch  $i$  ( $i = 1, \dots, 2m - 2, j = 1, \dots, n$ ). Thus, the clock model has  $n + 1$  parameters  
157 ( $c, \sigma_1, \dots, \sigma_n$ ), and there are  $(2m - 2) \times n$  independent rates in the tree. The relative  
158 rate  $r_{ij}$  serves as a multiplier to the mean rate. Large deviation of  $r_{ij}$  from 1.0 indicates  
159 severe heterogeneity of the morphological clock, while  $r_{ij}$ 's all being similar to 1.0  
160 models a somewhat strict clock. The branch length (distance, in unit of substitutions  
161 per character) in the Mkv likelihood calculation,  $b_{ij}$ , is the product of time duration  $t_i$   
162 and clock rate  $c_{ij}$  (i.e.,  $b_{ij} = t_i c_{ij} = t_i c r_{ij}$ ).

163 The prior used for the mean clock rate  $c$  was gamma(2, 200) with mean 0.01 and  
164 standard deviation 0.007, and that for  $\sigma_j$  was exponential(10).

## 165 Results and Discussion

166 There is no clear evidence for us to believe that all fossils are at the tips *a priori*,  
167 however, we encountered severe mixing problem in the MCMC when allowing fossil  
168 ancestors while partitioning the morphological characters into six anatomical regions.  
169 When treating the characters as a single partition on the other hand, we were able to  
170 achieve good mixing both allowing and disallowing fossil ancestors (setting  $r = 0$  and  
171  $r = 1$  respectively). Thus, we first show the results without partitioning the data and  
172 compare the difference between with and without fossil ancestors, then we focus on  
173 the evolutionary rate heterogeneity when the data is partitioned (only under  $r = 1$ ). In  
174 general, the parameter estimates are quite similar whether fossil ancestors are allowed,  
175 the difference is more dramatic whether the data is partitioned (see below).

176 *Single partition*

177 The phylogeny estimated from tip dating allowing fossil ancestors ( $r = 0$ ) is shown  
178 in Figure 1. The tree is well resolved, with a few polytomies mainly nested within  
179 Enantiornithes that represent the uncertainty of the taxa relationships. This topology  
180 agrees with previously published trees in the placements of the major clades (Wang et  
181 al. 2015; Wang and Lloyd 2016; Wang and Zhou 2018). The root age is estimated at  
182 162.56 (153.00, 171.26) Ma (see also Table 1), which covers the fixed age of 168.7  
183 Ma (1 myr older than the first appearance datum of Dromaeosauridae using the  
184 minimum branch length method) (Wang and Lloyd 2016). The posterior age of  
185 Dromaeosauridae is 154.90 (141.66, 167.69) Ma, mainly within Late Jurassic, while  
186 the prior range expands the whole Cretaceous (66.0, 167.7). As the posterior mean  
187 relative rate at the branch of Dromaeosauridae is 1.08 (close to 1.0), the similarity of  
188 the morphological characters informs a short time span. The mean ages of the  
189 divergences of Pygostylia, Ornithothoraces and Enantiornithes are about 6–8 myr  
190 older than the fixed ages in the previous study (Wang and Lloyd 2016). We  
191 emphasize that the age estimates using tip dating integrates all available sources of  
192 information but the minimum branch length method only used the first appearance  
193 datum of the oldest taxa thus might underestimate the ages.

194 When disallowing fossil ancestors ( $r = 1$ ), one concern might arise is that some  
195 node ages might be overestimated due to forcing every tip to be the result of  
196 speciation. However, the difference from allowing fossil ancestors ( $r = 0$ ) is really

197 minor in our case. The node ages are only about 1–2 myr older if not otherwise  
198 similar (Fig. 1). The topologies in these two cases are almost identical, except for two  
199 places—one is the placement of *Cruralispennia* which becomes unresolved in the big  
200 polytomy within Enantiornithes, the other is *Archaeornithura* which becomes a  
201 sibling of *Tianyuornis*. In fact, the estimated proportion of fossil ancestors is 0.13  
202 (0.06, 0.21), indicating most fossils are indeed tip fossils. *Enaliornis* and  
203 *Archaeornithura* have the highest posterior probabilities of being ancestral (0.95 and  
204 0.93 respectively).

205 The evolutionary rates are thus very similar for the two cases and we only show the  
206 result under  $r = 0$  (Fig. 1). The mean clock rate ( $c$ ) is estimated around 0.01  
207 substitutions per character per myr (i.e., approximately one character-state change per  
208 100 million years) (Table 1). The relative clock rate at each branch represents the  
209 deviation from the mean rate. We observe extremely high rates during early avian  
210 evolution (Fig. 1). The relative rates at the two branches from Aves to Pygostylia are  
211 6.63 (0.97, 17.49) and 5.34 (0.01, 15.52), and accelerate to 10.89 (0.00, 32.5) at the  
212 branch subtending Ornithothoraces. High rates are also encountered along the early  
213 branches of Ornithuromorpha, then slow down substantially towards crownward  
214 branches including the one leading to extant birds. Enantiornithes shows even higher  
215 rate of 11.24 (1.49, 30.75) when it diverges from Ornithuromorpha in the Early  
216 Cretaceous, and the rates decrease dramatically in its later history. These observations  
217 concurs with previous comparative studies that birds underwent a large scale of

218 diversification in tandem with the dinosaur-bird transition (Benson and Choiniere

219 2013; Lee et al. 2014; Wang and Lloyd 2016).

220 *Six partitions*

221 The evolutionary rates inferred above are averaged across all morphological

222 characters. Further partitioning the data into six anatomical regions make it feasible

223 for us to estimate refined evolutionary rates both along branches and across partitions.

224 Different partitions have their own independent rate variations while sharing the same

225 tree topology and geological time duration (i.e., single time tree  $\mathcal{T}$ ). As mentioned

226 above, the mixing was very poor if fossil ancestors were allowed ( $r = 0$ ) and

227 independent runs did not give consistent estimates. The difficulty was probably due to

228 limited data in each partition interfered with inefficient reversible-jump MCMC

229 (rjMCMC) algorithm (Green 1995) implemented. Further investigations are required.

230 At the moment, we just show the result disallowing fossil ancestors ( $r = 1$ ) which

231 simplifies the tree structure with no need for rjMCMC. In this case, the major clades

232 inferred in the tree are unchanged, although a few taxa with large uncertainties shuffle

233 a bit (Supplementary Figs S1–S6). Comparing with the node ages estimated under a

234 single partition, those at the early avian diversifications are slightly older (Fig. 1, see

235 also Table 1) while the younger ages become more similar. The age differences are

236 more dramatic whether the data is partitioned than whether fossil ancestors are

237 allowed.

238 The rates of morphological character changes are quite heterogeneous among the  
239 six regions during early avian evolution (Fig. 2), although the mean rate ( $c$ ) estimated  
240 is almost identical as before (Table 1). The branch subtending Pygostylia shows  
241 extremely high rate in the axial skeleton (Fig. 2, Supplementary Fig. S2), which is one  
242 order of magnitude higher than in the rest five regions. Clearly, the high rate observed  
243 here indicates extensive morphological changes in the vertebral column, and the most  
244 recognizable change is that a long tail consisting of over 20 caudal vertebrae in  
245 *Archaeopteryx* and *Jeholornis* is replaced by a short element called pygostyle which is  
246 formed by the fusion of several caudal most vertebrae (Wang and Zhou 2017). The  
247 transition from long to short tail is functionally important for the evolution of  
248 powered flight in birds: a short tail could forward the gravitational center, and with  
249 attached feathers become indispensable for the avian flight apparatus (Gatesy and  
250 Dial 1996). The branches subtending Ornithothoraces and Enantiornithes show very  
251 rapid morphological changes in the pectoral girdle and sternum, and moderately high  
252 rates in the forelimb (Fig. 2, Supplementary Figs S3&S4). In comparison, the  
253 corresponding rates in the other regions are close to 1.0 with slight variation. These  
254 results suggest that most of the changes related to the shoulder and forelimb are close  
255 to the origin of Ornithothoraces, for example, the presence of an ossified sternum with  
256 a keel (attachment for the major flight muscle in modern birds) and further elongate  
257 forelimb (O'Connor and Zhou 2015), contributing to the refinement of flight  
258 capability. The rapid morphological changes towards Enantiornithes correspond to

259 their unique shoulder morphology relative to the ancestor Ornithothoraces; for  
260 instance, enantiornithines have a sternum with a caudally restricted keel and an  
261 elongate acromion of the scapula, both of which are the major components of the  
262 flight apparatus in birds (Chiappe and Walker 2002; Wang and Zhou 2017). Previous  
263 morphometric study suggested that Enantiornithes have different flight style  
264 compared with other Mesozoic birds in terms of limb proportion (Dyke and Nudds  
265 2009). The rest of the relatively slow and even rates suggest that there is no dominant  
266 selective pressure in favoring of modifications in the skull and pelvis.

267     When we compared the evolutionary rates between Enantiornithes and  
268 Ornithuromorpha across the six regions by summarizing the mean relative rates  
269 within each clade (excluding *Anas*, *Gallus* and their common ancestral branch), the  
270 differences are not striking, with medians uniformly close to 1.0 (Fig. 3). However,  
271 significantly high rates (outliers) are detected along some early diverging branches  
272 within these two clades, and a slowdown in more crownward branches (Fig. 3,  
273 Supplementary Figs S1–S6), suggesting that morphological changes are rapid in early  
274 diversifications and the process slows down subsequently due to saturated ecological  
275 niches for these two avian groups, as proposed in previous study (Wang and Lloyd  
276 2016).

277     To test the robustness of age estimates to the root age prior and the impact on  
278 evolutionary rates in consequence, we halved and doubled the range between the  
279 mean and minimal in the original prior, that is, using  $\text{offset-exp}(153, 161)$  and

280 offset-exp(153, 185) priors for the root age. This comparison showed slightly varied  
281 posterior age estimates deep in the tree. For the root age in particular, the estimates  
282 are 170.83 (161.33, 179.78) and 174.31 (164.34, 184.77) under the smaller and larger  
283 prior mean respectively. Thus, the conclusion of evolutionary rate heterogeneity  
284 above is not changed as the age differences are minor comparing with the  
285 significantly high rates which are usually one order of magnitude higher than 1.0.

286 Another concern related to the accuracy of age estimates might be the nonuniform  
287 fossil record both in its geographical and stratigraphic distribution. Although more  
288 complicated models allowing fossil sampling rate vary over time are available  
289 (Gavryushkina et al. 2014; Zhang et al. 2016), it is not practical to apply in our case to  
290 make reliable inference. The current model assuming constant sampling rate is a  
291 balance between model complexity (number of parameters) and model adequacy  
292 (accommodating rate variation across lineages). Since the focus of our study is on the  
293 deep divergence times and the evolutionary rates, the rich fossil record in Early  
294 Cretaceous provided a great deal of information to produce reliable estimates deep in  
295 the tree. For the age estimates in the Late Cretaceous or later, biases might be severe  
296 due to limited fossil record. In particular, the divergence time of Anas and Gallus has  
297 been estimated at the early Eocene (Prum et al. 2015) associated with high  
298 evolutionary rates at the crown. In comparison, we inferred much younger age of 9.46  
299 (4.57, 15.07) Ma with a long, low-rate ancestral branch. The underestimation was

300 mainly due to lacking fossil or node calibrations within that clade, so the posterior  
301 estimate tended to be similar to the prior.

302 The gamma shape parameter ( $\alpha$ ) of character rate variation is larger than 1.0 (Table  
303 1), indicating that the evolutionary rates are fairly homogeneous across characters.  
304 Note this gamma distribution models rate variation across characters and is  
305 independent of the gamma distributions for rate variation across branches in the  
306 relaxed clock model.

307 Partitioning the data is a common practice in molecular phylogenetic analyses  
308 (Nylander et al. 2004; Brown and Lemmon 2007). The different partitions may  
309 correspond to different genes and may also correspond to different codon positions in  
310 a protein-coding gene. On the other hand, morphological characters are typically  
311 treated as a single partition unless sufficient characters are available (Lee 2016) or  
312 simple model assumptions are made (Clarke and Middleton 2008). While successfully  
313 demonstrating the different evolutionary dynamics modeled by independent rate  
314 parameters in the six partitions, we note that the variance is very large (Fig. 2, widths  
315 of the error bars) due to limited number of characters in each partition. Further effort  
316 of coding more characters would refine the resolution.

317 In summary, the Bayesian tip dating approach implemented in MrBayes is a  
318 powerful and flexible tool to simultaneously estimate the tree topology, divergence  
319 times, evolutionary rates, and the other parameters of interest while accounting for  
320 their uncertainties. In the priors, we are able to incorporate the uncertainty of each



321 fossil age, model the speciation, extinction, fossilization and sampling process  
322 explicitly, and take advantage of the relaxed clock model to investigate rate variation  
323 cross branches and partitions. It is feasible to integrate all available sources of  
324 information in the analysis, rather than discarding certain information or uncertainties  
325 in the parsimony and stepwise approach. Although the focal species are Mesozoic  
326 birds in this study, tip dating is a general framework applicable to a wide range of  
327 taxonomic groups with potential future extensions to the theoretical model and  
328 practical implementation.

### 329 **Availability**

330 The models described above were implemented in MrBayes version 3.2.7  
331 (Ronquist et al. 2012b. <https://github.com/NBISweden/MrBayes>; last accessed  
332 September 10, 2018).

### 333 **Supplementary Material**

334 Data available from the Dryad Digital Repository: <http://dx.doi.org/>.

### 335 **Funding**

336 This research is supported by the 100 Young Talents Program of Chinese Academy  
337 of Sciences (to C.Z.). M.W. is supported by National Natural Science Foundation of  
338 China (41722202).

339 **Acknowledgments**

340 We sincerely thank three anonymous reviewers for constructive criticisms of the  
341 original article and excellent suggestions for improvement.

342 **References**

343 Bapst D.W., Wright A.M., Matzke N.J., Lloyd G.T. 2016. Topology, divergence dates,  
344 and macroevolutionary inferences vary between different tip-dating approaches  
345 applied to fossil theropods (Dinosauria). *Biol. Lett.* 12:20160237.

346 Benson R.B.J., Choiniere J.N. 2013. Rates of dinosaur limb evolution provide  
347 evidence for exceptional radiation in Mesozoic birds. *Proc. Biol. Sci.*  
348 280:20131780–20131780.

349 Brown J.M., Lemmon A.R. 2007. The importance of data partitioning and the utility  
350 of Bayes factors in Bayesian phylogenetics. *Syst. Biol.* 56:643–655.

351 Brusatte S.L., Lloyd G.T., Wang S.C., Norell M.A. 2014. Gradual assembly of avian  
352 body plan culminated in rapid rates of evolution across the dinosaur-bird  
353 transition. *Curr. Biol.* 24:2386–2392.

354 Chiappe L.M., Meng Q. 2016. *Birds of stone: Chinese avian fossils from the age of*  
355 *dinosaurs.* Johns Hopkins University Press.

356 Chiappe L.M., Walker C.A. 2002. *Skeletal morphology and systematics of the*

- 357 Cretaceous Euenantiornithes (Ornithothoraces: Enantiornithes). In: Chiappe L.M.,  
358 Witmer L.M. editors. Mesozoic birds: above the heads of dinosaurs. California:  
359 University of California Press. pp. 240–267.
- 360 Clarke J.A., Middleton K.M. 2008. Mosaicism, modules, and the evolution of birds:  
361 Results from a Bayesian approach to the study of morphological evolution using  
362 discrete character data. *Syst. Biol.* 57:185–201.
- 363 Dyke G.J., Nudds R.L. 2009. The fossil record and limb disparity of enantiornithines,  
364 the dominant flying birds of the Cretaceous. *Lethaia.* 42:248–254.
- 365 Field D.J., Hanson M., Burnham D., Wilson L.E., Super K., Ehret D., Ebersole J.A.,  
366 Bhullar B.-A.S. 2018. Complete Ichthyornis skull illuminates mosaic assembly of  
367 the avian head. *Nature.* 557:96–100.
- 368 Gatesy S.M., Dial K.P. 1996. Locomotor modules and the evolution of avian flight.  
369 *Evolution.* 50:331–340.
- 370 Gavryushkina A., Heath T.A., Ksepka D.T., Stadler T., Welch D., Drummond A.J.  
371 2016. Bayesian total-evidence dating reveals the recent crown radiation of  
372 penguins. *Syst. Biol.* 66:57–73.
- 373 Gavryushkina A., Welch D., Stadler T., Drummond A.J. 2014. Bayesian inference of  
374 sampled ancestor trees for epidemiology and fossil calibration. *PLoS Comput.*  
375 *Biol.* 10:e1003919.

- 376 Gill F.B. 2007. Ornithology. New York: W.H. Freeman.
- 377 Gill F.B., Wright M.T. 2006. Birds of the world: recommended English names.  
378 Princeton: Princeton University Press.
- 379 Green P.J. 1995. Reversible jump Markov chain Monte Carlo computation and  
380 Bayesian model determination. *Biometrika*. 82:711–732.
- 381 Heath T.A., Huelsenbeck J.P., Stadler T. 2014. The fossilized birth-death process for  
382 coherent calibration of divergence-time estimates. *Proc. Natl. Acad. Sci. USA*.  
383 111:E2957–66.
- 384 King B., Qiao T., Lee M.S.Y., Zhu M., Long J.A. 2017. Bayesian morphological  
385 clock methods resurrect placoderm monophyly and reveal rapid early evolution in  
386 jawed vertebrates. *Syst. Biol.* 66:499–516.
- 387 Lee M.S.Y. 2016. Multiple morphological clocks and total-evidence tip-dating in  
388 mammals. *Biol. Lett.* 12:20160033.
- 389 Lee M.S.Y., Cau A., Naish D., Dyke G.J. 2014. Morphological clocks in paleontology,  
390 and a mid-Cretaceous origin of crown Aves. *Syst. Biol.* 63:442–449.
- 391 Lepage T., Bryant D., Philippe H., Lartillot N. 2007. A general comparison of relaxed  
392 molecular clock models. *Mol. Biol. Evol.* 24:2669–2680.
- 393 Lewis P.O. 2001. A likelihood approach to estimating phylogeny from discrete

- 394 morphological character data. *Syst. Biol.* 50:913–925.
- 395 Lloyd G.T. 2016. Estimating morphological diversity and tempo with discrete  
396 character-taxon matrices: implementation, challenges, progress, and future  
397 directions. *Biological Journal of the Linnean Society.* 118:131–151.
- 398 Matzke N.J., Wright A. 2016. Inferring node dates from tip dates in fossil Canidae:  
399 the importance of tree priors. *Biol. Lett.* 12:20160328.
- 400 Mayr G. 2009. Paleogene fossil birds. Berlin Heidelberg: Springer-Verlag.
- 401 Nylander J.A.A., Ronquist F., Huelsenbeck J.P., Nieves-Aldrey J.L. 2004. Bayesian  
402 phylogenetic analysis of combined data. *Syst. Biol.* 53:47–67.
- 403 O'Connor J.K., Zhou Z. 2013. A redescription of *Chaoyangia beishanensis* (Aves)  
404 and a comprehensive phylogeny of Mesozoic birds. *Journal of Systematic  
405 Palaeontology.* 11:889–906.
- 406 O'Connor J., Zhou Z. 2015. Early evolution of the biological bird: perspectives from  
407 new fossil discoveries in China. *Journal of Ornithology.* 156:333–342.
- 408 Prum R.O., Berv J.S., Dornburg A., Field D.J., Townsend J.P., Lemmon E.M.,  
409 Lemmon A.R. 2015. A comprehensive phylogeny of birds (Aves) using targeted  
410 next-generation DNA sequencing. *Nature.* 526:569–573.
- 411 Pyron R.A. 2011. Divergence time estimation using fossils as terminal taxa and the

- 412 origins of Lissamphibia. *Syst. Biol.* 60:466–481.
- 413 Ronquist F., Klopstein S., Vilhelmsen L., Schulmeister S., Murray D.L., Rasnitsyn  
414 A.P. 2012a. A total-evidence approach to dating with fossils, applied to the early  
415 radiation of the Hymenoptera. *Syst. Biol.* 61:973–999.
- 416 Ronquist F., Lartillot N., Phillips M.J. 2016. Closing the gap between rocks and  
417 clocks using total-evidence dating. *Philos. Trans. R. Soc. Lond. B Biol. Sci.* 371:  
418 20150136.
- 419 Ronquist F., Teslenko M., van der Mark P., Ayres D.L., Darling A., Höhna S., Larget  
420 B., Liu L., Suchard M.A., Huelsenbeck J.P. 2012b. MrBayes 3.2: efficient  
421 Bayesian phylogenetic inference and model choice across a large model space.  
422 *Syst. Biol.* 61:539–542.
- 423 Stadler T. 2010. Sampling-through-time in birth-death trees. *J. Theor. Biol.*  
424 267:396–404.
- 425 Wang M., Lloyd G.T. 2016. Rates of morphological evolution are heterogeneous in  
426 Early Cretaceous birds. *Proc. Biol. Sci.* 283:20160214.
- 427 Wang M., O'Connor J.K., Pan Y., Zhou Z. 2017. A bizarre Early Cretaceous  
428 enantiornithine bird with unique crural feathers and an ornithuromorph  
429 plough-shaped pygostyle. *Nat Commun.* 8:14141.
- 430 Wang M., O'Connor J.K., Zhou Z. 2018. A taxonomical revision of the

- 431 Confuciusornithiformes (Aves: Pygostylia). *Vertebrata Palasiatica*.
- 432 Wang M., Zheng X., O'Connor J.K., Lloyd G.T., Wang X., Wang Y., Zhang X., Zhou  
433 Z. 2015. The oldest record of ornithuromorpha from the early cretaceous of China.  
434 *Nat Commun.* 6:6987.
- 435 Wang M., Zhou Z. 2017. The evolution of birds with implications from new fossil  
436 evidences. In: Maina N.J., editor. *The Biology of the Avian Respiratory System*.  
437 Cham: Springer International Publishing. pp. 1–26.
- 438 Wang M., Zhou Z. 2018. A new confuciusornithid (Aves: Pygostylia) from the Early  
439 Cretaceous increases the morphological disparity of the Confuciusornithidae.  
440 *Zoological Journal of the Linnean Society*. in press.
- 441 Yang Z. 1994. Maximum likelihood phylogenetic estimation from DNA sequences  
442 with variable rates over sites: approximate methods. *J. Mol. Evol.* 39:306–314.
- 443 Zhang C., Stadler T., Klopstein S., Heath T.A., Ronquist F. 2016. Total-evidence  
444 dating under the fossilized birth-death process. *Syst. Biol.* 65:228–249.
- 445

446 Table 1. Posterior distributions (mean and 95% HPD interval) of model parameters

|                             | single partition, $r = 0$ | single partition, $r = 1$ | six partitions, $r = 1$ |
|-----------------------------|---------------------------|---------------------------|-------------------------|
| $\alpha$                    | 1.81 (1.35, 2.31)         | 1.82 (1.35, 2.31)         | 1.80 (1.33, 2.27)       |
| $d = \lambda - \mu - r\psi$ | 0.010 (0.00087, 0.022)    | 0.010 (0.00075, 0.021)    | 0.010 (0.00042, 0.020)  |
| $v = (\mu + r\psi)/\lambda$ | 0.98 (0.94, 1.00)         | 0.93 (0.81, 1.00)         | 0.92 (0.79, 1.00)       |
| $s = \psi/(\mu + \psi)$     | 0.028 (0.00047, 0.075)    | 0.33 (0.00051, 0.90)      | 0.35 (0.00059, 0.90)    |
| $t_{\text{mrca}}$           | 162.56 (153.00, 171.26)   | 164.17 (153.33, 173.34)   | 172.61 (164.01, 180.81) |
| $c$                         | 0.012 (0.0090, 0.015)     | 0.011 (0.0083, 0.014)     | 0.010 (0.0081, 0.012)   |
| $\sigma$ or $\sigma_1$      | 0.058 (0.035, 0.084)      | 0.058 (0.036, 0.084)      | 0.070 (0.026, 0.12)     |
| $\sigma_2$                  |                           |                           | 0.069 (0.028, 0.12)     |
| $\sigma_3$                  |                           |                           | 0.057 (0.028, 0.090)    |
| $\sigma_4$                  |                           |                           | 0.053 (0.025, 0.087)    |
| $\sigma_5$                  |                           |                           | 0.042 (0.0017, 0.084)   |
| $\sigma_6$                  |                           |                           | 0.061 (0.029, 0.095)    |

447

448



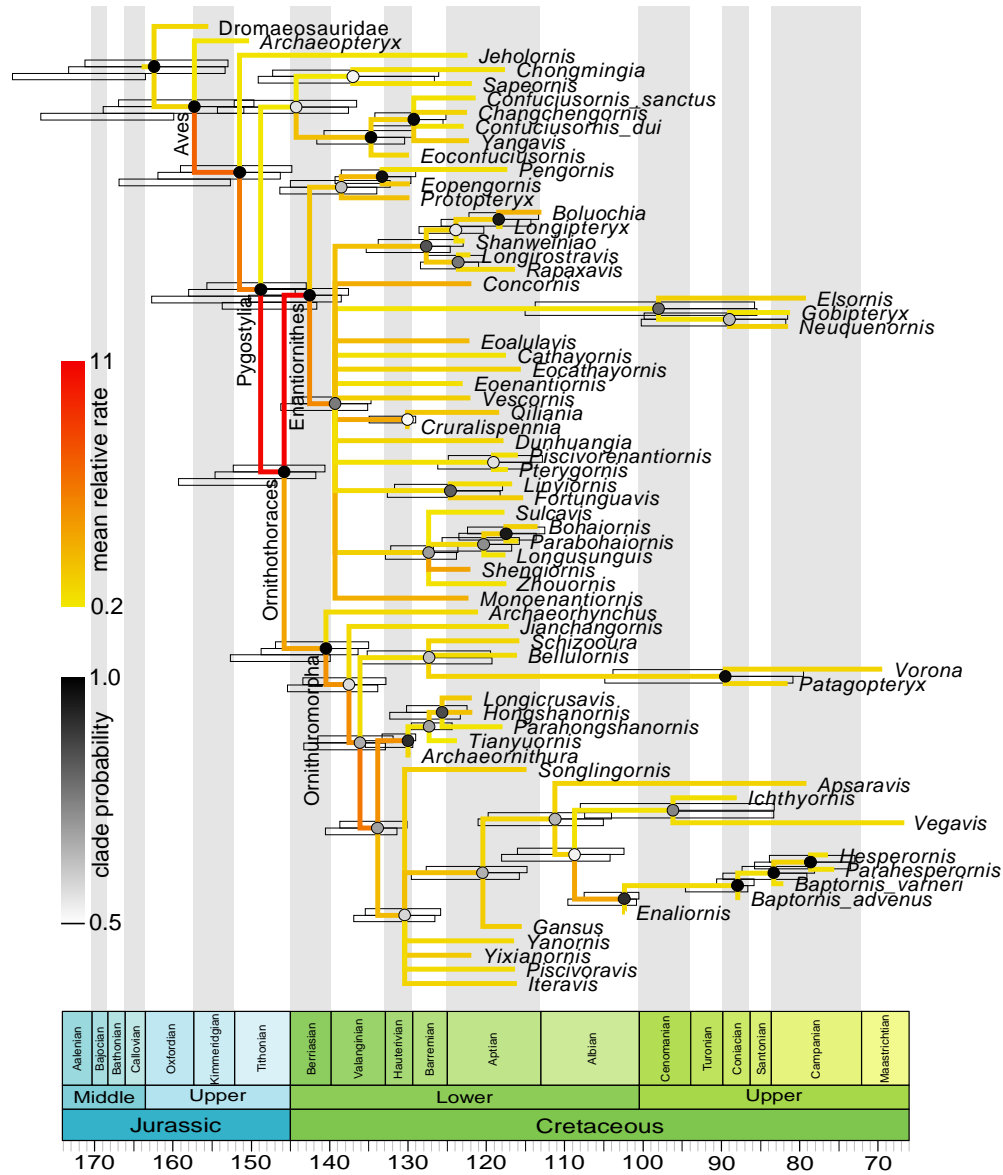

449

450

451 Figure 1. Dated phylogeny (time tree) of Mesozoic birds. The topology (majority-rule  
 452 consensus tree) shown is inferred allowing fossil ancestors ( $r = 0$ ) without partitioning  
 453 the morphological characters. The node ages in the tree are the posterior medians and  
 454 the shade of each circle represents the posterior probability of the corresponding clade.  
 455 The color of the branch represents the mean relative clock rate at that branch. The  
 456 error bars on the top (in blue) at the internal nodes denote the 95% HPD intervals of

457 age estimates. In comparison, the error bars below (if present, in cyan) denote the 95%  
458 HPD intervals when disallowing fossil ancestors ( $r = 1$ ) under a single partition.  
459 Additionally, the error bars shown at the early avian diversifications (in green) are the  
460 95% HPD intervals of age estimates when the characters are partitioned into six  
461 anatomical regions and disallowing fossil ancestors ( $r = 1$ ). The two extant species  
462 (*Anas* and *Gallus*) were included in the analyses but not shown in the representation  
463 (as a sister clade of *Vegavis*).

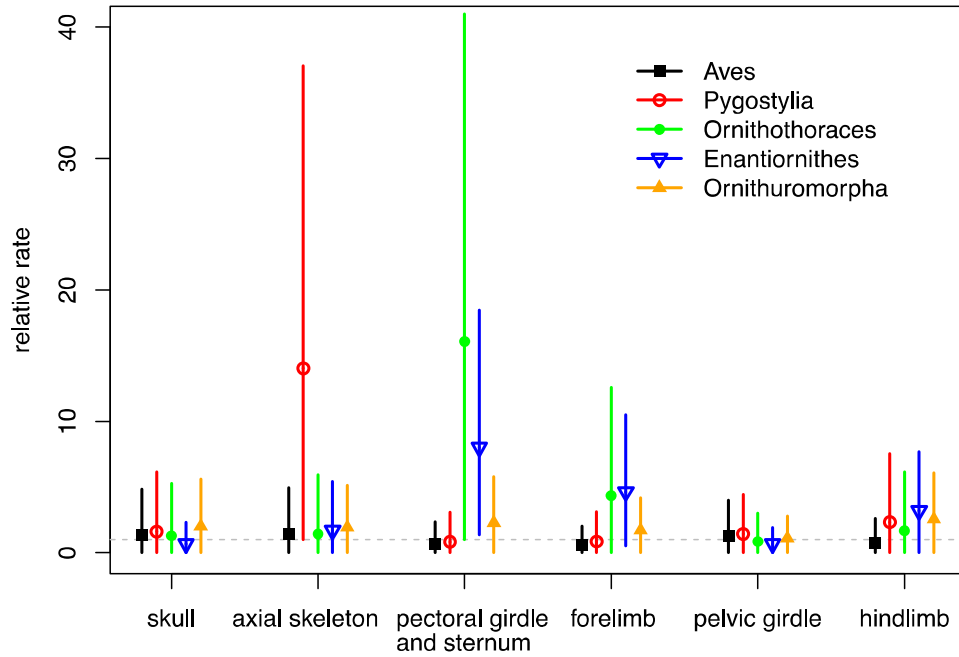

464

465

466 Figure 2. Posterior estimates of the relative clock rates along the branches subtending

467 the major transitions of early avian evolution for six anatomical regions of the bird

468 body. The dot and error bar denote the mean and 95% HPD interval for each estimate.

469 The horizontal dashed line indicates the mean relative rate of 1.0 in the relaxed model.

470

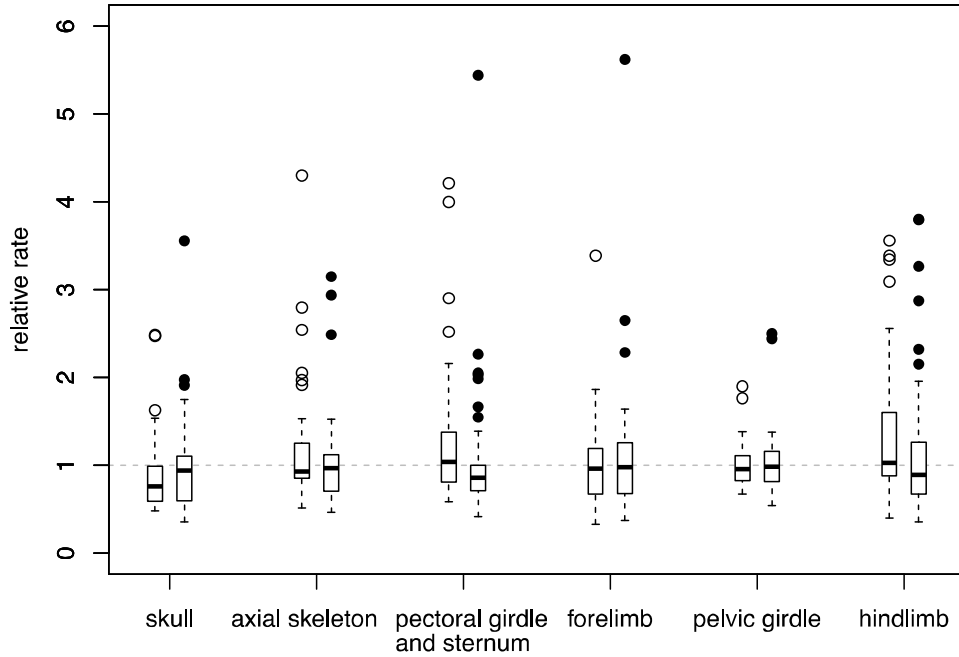

471

472

473 Figure 3. Boxplots summarizing the mean relative clock rates across branches in the  
474 Enantiornithes clade (left) and Ornithuromorpha clade (right) respectively, for the six  
475 anatomical regions. The box denotes the 1<sup>st</sup>, 2<sup>nd</sup> (median) and 3<sup>rd</sup> quartiles while the  
476 dots are the outliers. The horizontal dashed line indicates the mean relative rate of 1.0  
477 in the relaxed clock model.

478
